# Supplementary material for: Tunable electronic and magnetic properties of arsenene nanoribbons
Source: Royal Society of Chemistry journal article supplement (doi:10.1039/c7ra05137a), 2017-01-01
Supplement: c7ra05137a1.pdf [file c7ra05137a1.pdf]

**Tunable electronic and magnetic properties of arsenene nanoribbons**

Lei Ao<sup>a,b</sup>, Anh Pham<sup>b,c\*</sup>, Frank Klose<sup>c,d</sup>, Xia Xiang<sup>a+</sup>, Sean Li<sup>b</sup>, and Xiaotao Zu<sup>a</sup>

<sup>a</sup>School of Physical Electronics, University of Electronic Science and Technology of

China, Chengdu 610054, China

<sup>b</sup>School of Material Science and Engineering, University of New South Wales,

Sydney 2052, Australia

<sup>c</sup>Australian Nuclear Science and Technology Organization, Lucas Heights 2234,

Australia

<sup>d</sup>Guangdong Technion Israel Institute of Technology, Shantou, China

E-mail: \*anh.pham@unsw.edu.au

+xiaxiang@uestc.edu.cn

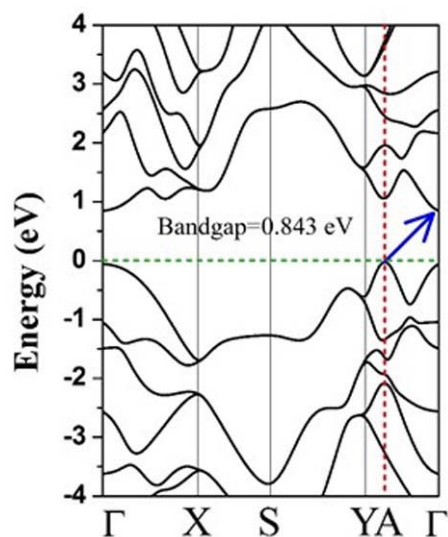

Fig. S1 Band structure of the As monolayer. The Fermi level is set to zero. The indirect band gap is indicated by the blue arrow.

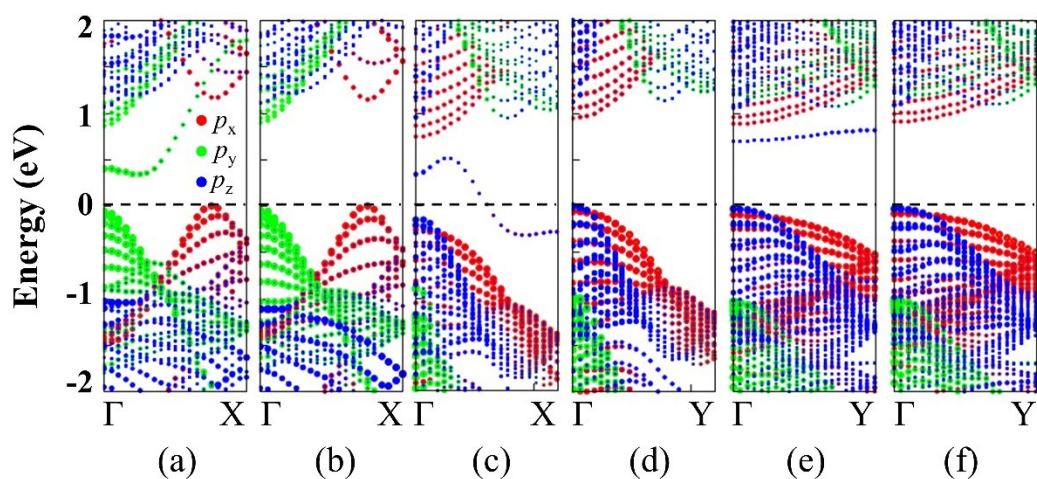

Fig. S2 Orbital-resolved band structures of the As 12-NR with the (a) unpassivated AC edge, (b) H passivated AC edge, (c) unpassivated ZZ-1 edge (nonmagnetic state), (d) H passivated ZZ-1 edge, (e) unpassivated ZZRC-o edge and (f). H passivated ZZRC-o edge. The Fermi level is set to zero.

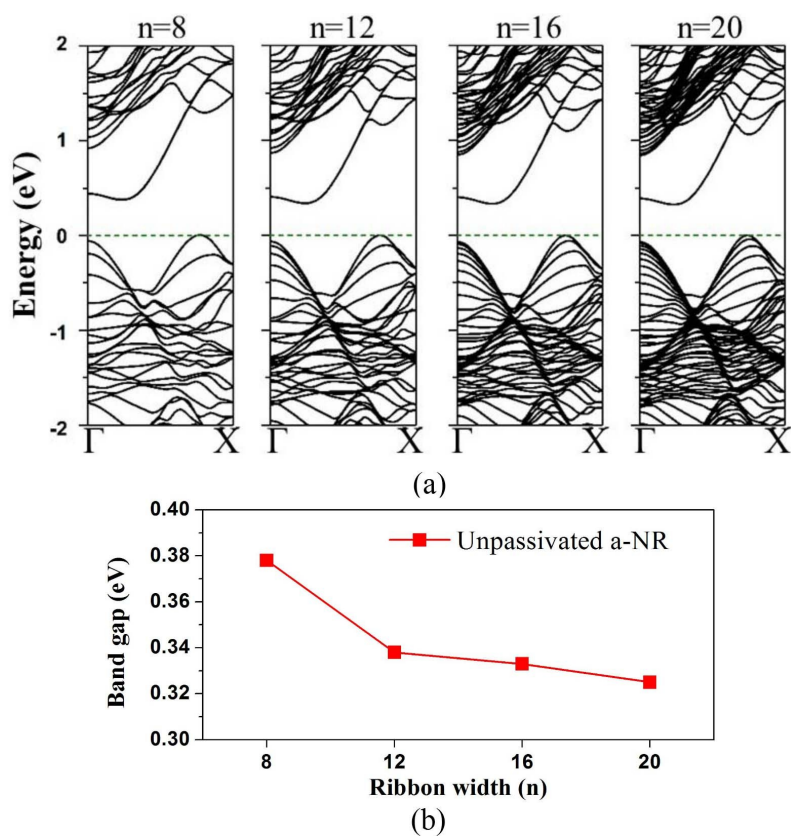

Fig. S3 (a) Band structures and (b) variation of the band gap of the unpassivated a-NRs versus ribbon width  $n$ . The Fermi level is set to zero.

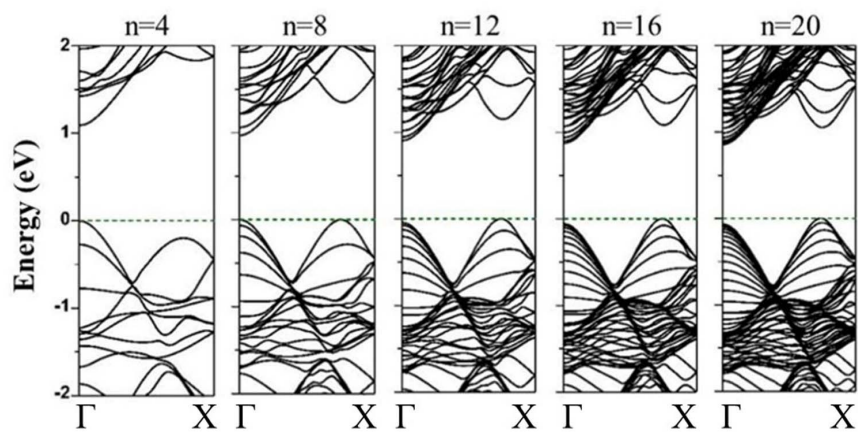

Fig. S4 Band structures of the H passivated As a-NRs versus ribbon width  $n$ . The Fermi level is set to zero.

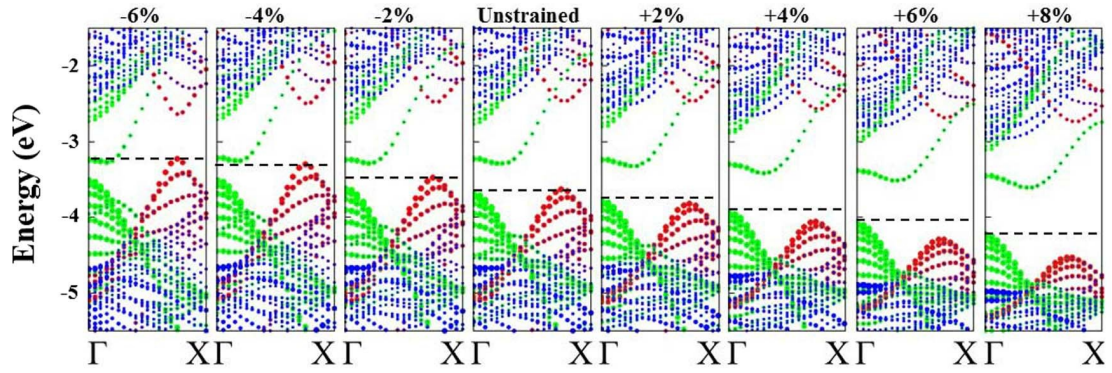

Fig. S5 Strain-dependent orbital-resolved band structures of the unpassivated As 12-a-NR. The color coding of the As  $p$  orbitals is the same as that in Fig. S2.

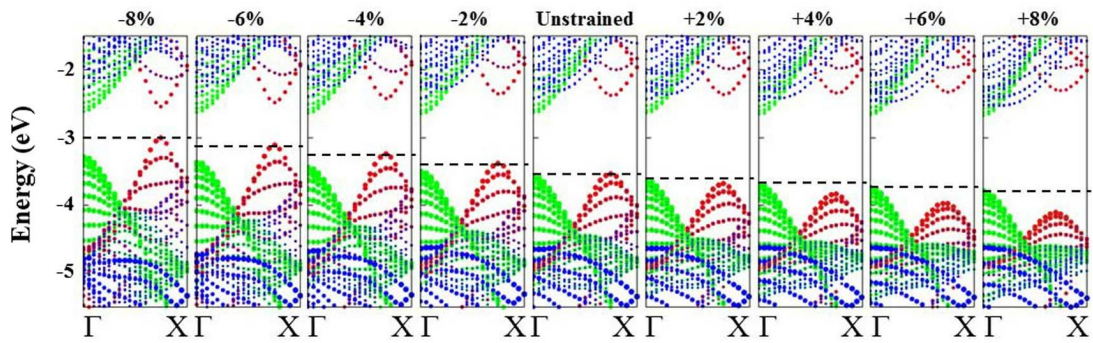

Fig. S6 Strain-dependent orbital-resolved band structures of the H passivated As 12-a-NR. The color coding of the As  $p$  orbitals is the same as that in Fig. S2.

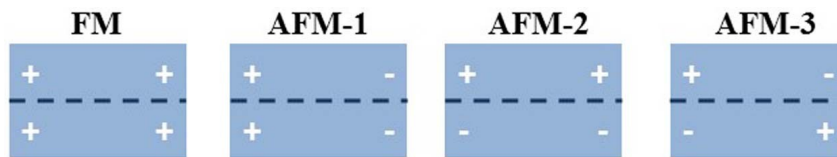

Fig. S7 Schematic view of the unpassivated As 12-z-NRs with different magnetic configurations.

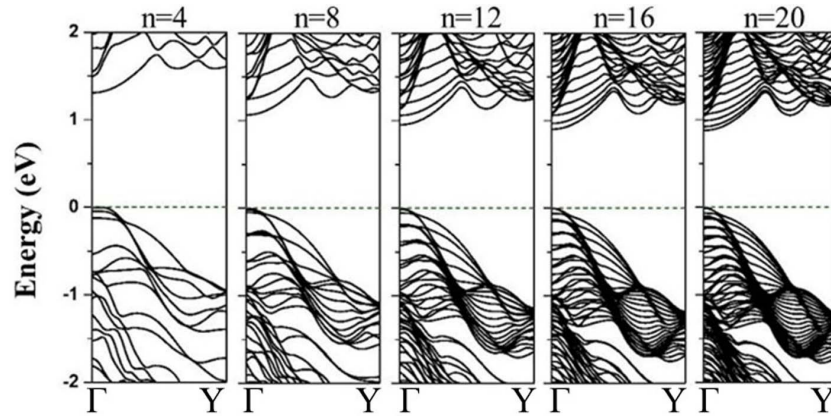

Fig. S8 Band structures of the H passivated As z-NRs versus ribbon width  $n$ . The Fermi level is set to zero.

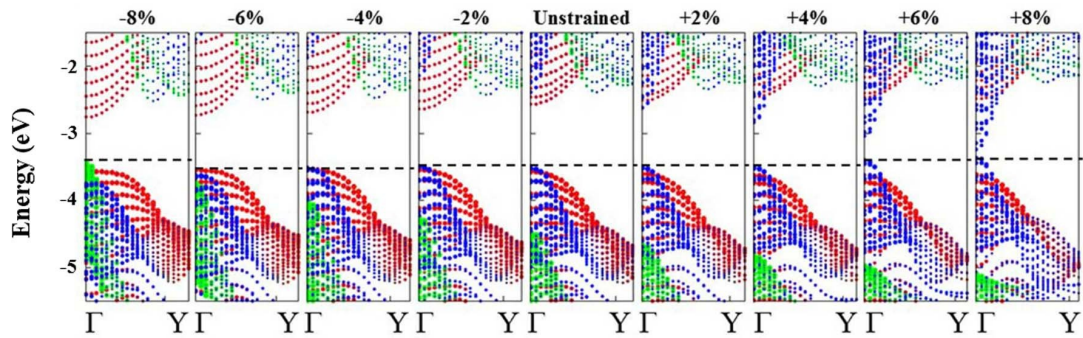

Fig. S9 Strain-dependent orbital-resolved band structures of the H passivated As 12-z-NR. The Fermi level is set to zero. The color coding of the As  $p$  orbitals is the same as that in Fig. S2.

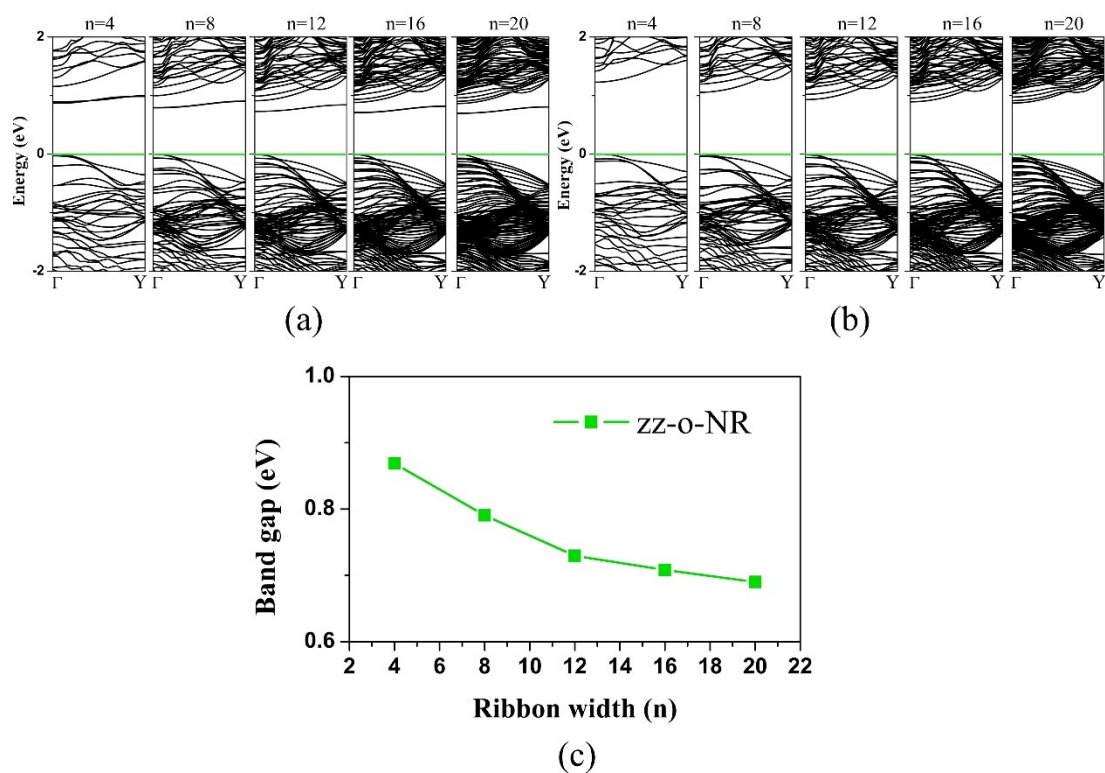

Fig. S10 (a) Band structures and (b) variation of the band gap of the zz-o-NRs versus ribbon width  $n$ . The Fermi level is set to zero.

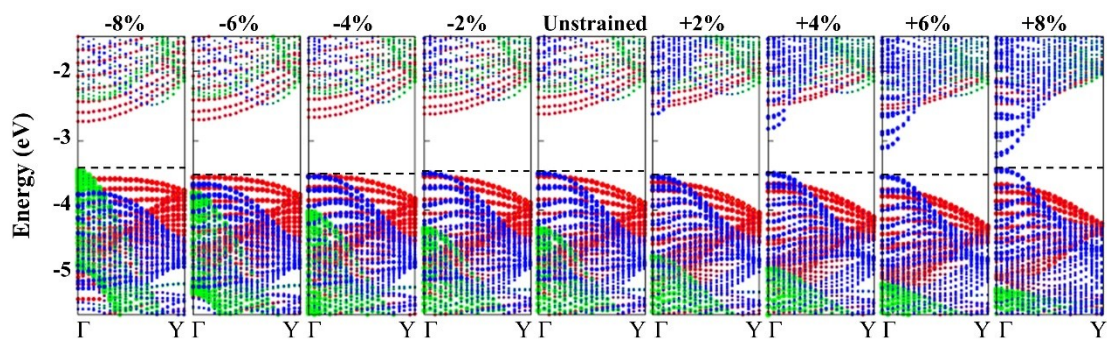

Fig. S11 Strain-dependent orbital-resolved band structures of the H passivated As 12-zz-o-NR. The Fermi level is set to zero. The color coding of the As  $p$  orbitals is the same as that in Fig. S2.

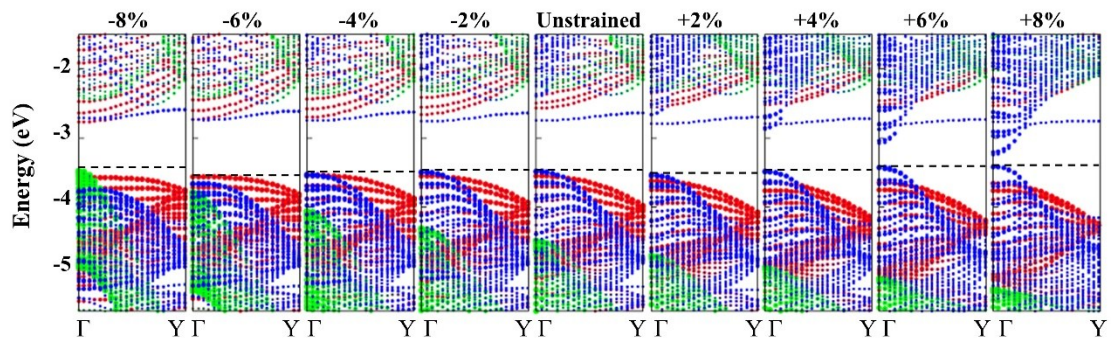

Fig. S12 Strain-dependent orbital-resolved band structures of the unpassivated As 12-zz-o-NR. The Fermi level is set to zero. The color coding of the As  $p$  orbitals is the same as that in Fig. S2.
